# Supplementary material
Source: publisher figshare collection journal article supplement (https://frontiersin.figshare.com/ndownloader/files/15140216)
Supplement: Supplementary file [file 15140216]

## Supplementary figure for review purposes only

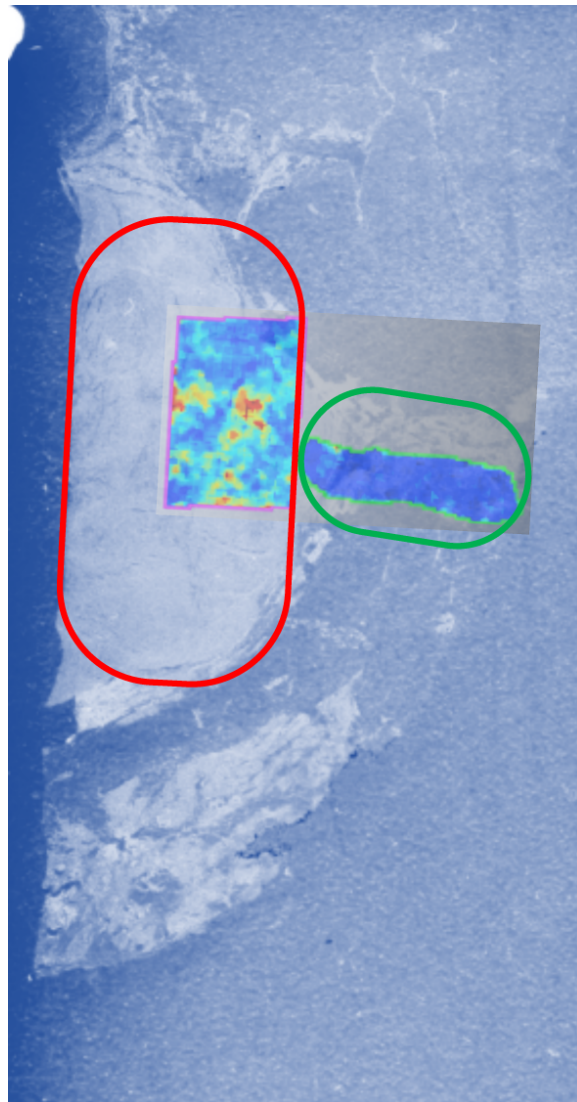

Figure shows an example of the actual imaged areas (bounded by red for cancer, green for non-cancer) within the larger regions of the tissue section designated as either cancer (red) or benign (green) by the pathologist.
